# Supplementary material for: A simple, label-free, electrochemical DNA parity generator/checker for error detection during data transmission based on “aptamer-nanoclaw”-modulated protein steric hindrance
Source: PubMed Central journal article supplement — Chem Sci. 2018 Jul 19;9(34):6981–7. doi: 10.1039/c8sc02482k (PMC6124900; doi:10.1039/c8sc02482k), 2018-07-19
Supplement: SC-009-C8SC02482K-s001.pdf [file SC-009-C8SC02482K-s001.pdf]

*Supporting Information for*

**Simple, Label-free, Electrochemical DNA Parity  
Generator/Checker for Error Detection during Data  
Transmission Based on “Aptamer-Nanoclave”-modulated  
Protein Steric Hindrance**

*Daoqing Fan,<sup>ab</sup> Yongchao Fan,<sup>ab</sup> Erkang Wang,<sup>ab</sup> Shaojun Dong<sup>ab\*</sup>*

<sup>a</sup> State Key Laboratory of Electroanalytical Chemistry, Changchun Institute of Applied Chemistry, Chinese Academy of Sciences, Changchun, Jilin, 130022, China.

<sup>b</sup> University of Chinese Academy of Sciences, Beijing, 100039, China.

**\*Corresponding Author**

E-mail: [dongsj@ciac.ac.cn](mailto:dongsj@ciac.ac.cn).

**Table S1.** Sequences of DNA used in this work.

| Strands | Sequences (5' to 3')                                                 |
|---------|----------------------------------------------------------------------|
| S       | <i>SH</i> -ATTCGTCAGTTTCGTATCACGTTTCTGTGCAAT                         |
| Ca      | GGTTGGTGTGGTTGG<br>ATATTACGATGAAGCAAACGTTAGACGAAACTATATAAT           |
| Cb      | GGTTGGTGTGGTTGG<br>ATTATATAGAAACGTCTAACGAAATGCTTCATCGTAATAT          |
| TCb     | GGTTGGTGTGGTTGG<br>ATTATATAGAAACGTCTAACGAAATGCTTCATCGTAATAT<br>TTTTT |
| T20     | TTTTT TTTTT TTTTT TTTTT                                              |
| T30     | TTTTT TTTTT TTTTT TTTTT TTTTT TTTTT                                  |
| T40     | TTTTT TTTTT TTTTT TTTTT TTTTT TTTTT TTTTT                            |

For the detailed DNA hybridization of strands S, Ca, Cb, their different reactions were simulated on the website: <http://unafold.rna.albany.edu/?q=DINAMelt/Two-state-melting>, and the parameters during simulation were used as default. The TBA15 “nanoclave” parts were noted with red frameworks, and the names with different colors represented the three strands (the colors were consistent with **Table S1**.)

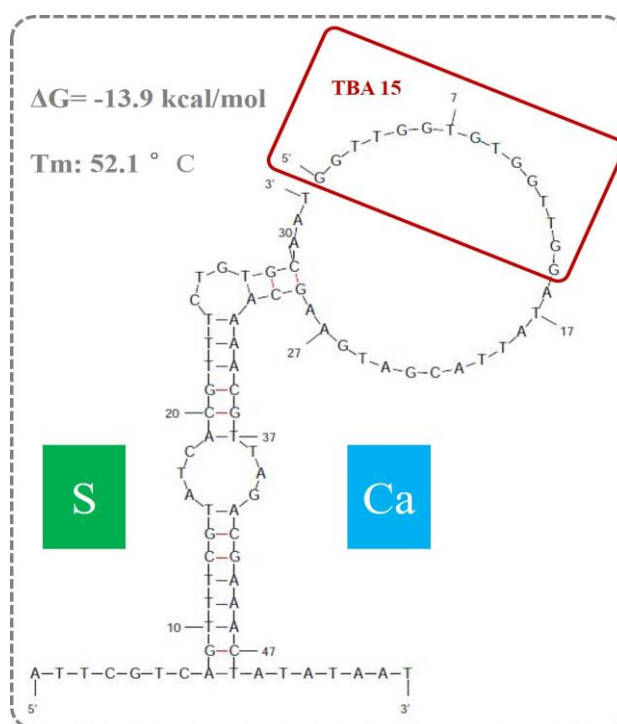

**Figure S1.** Schematic diagram of the hybridization between strand S and Ca.

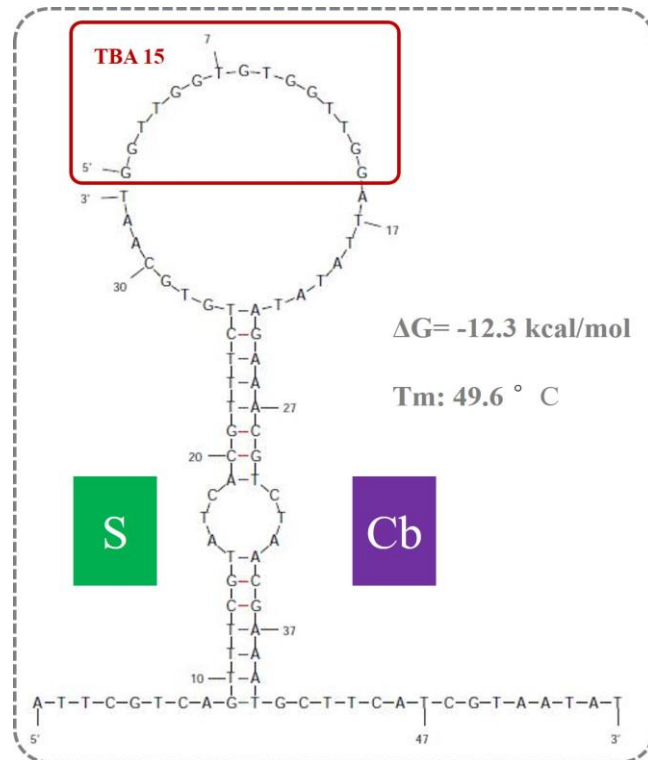

**Figure S2.** Schematic diagram of the hybridization between strand S and Cb.

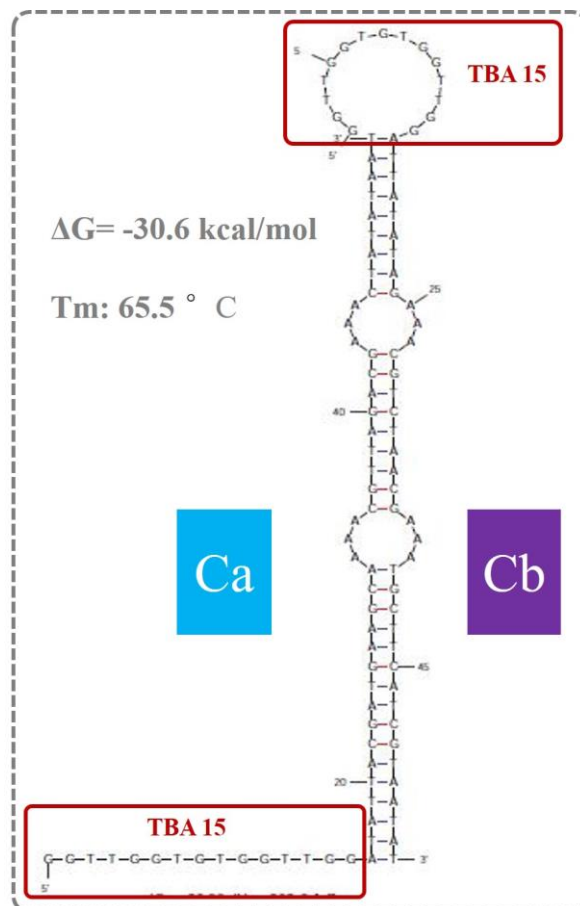

**Figure S3.** Schematic diagram of the hybridization between strand Ca and Cb.

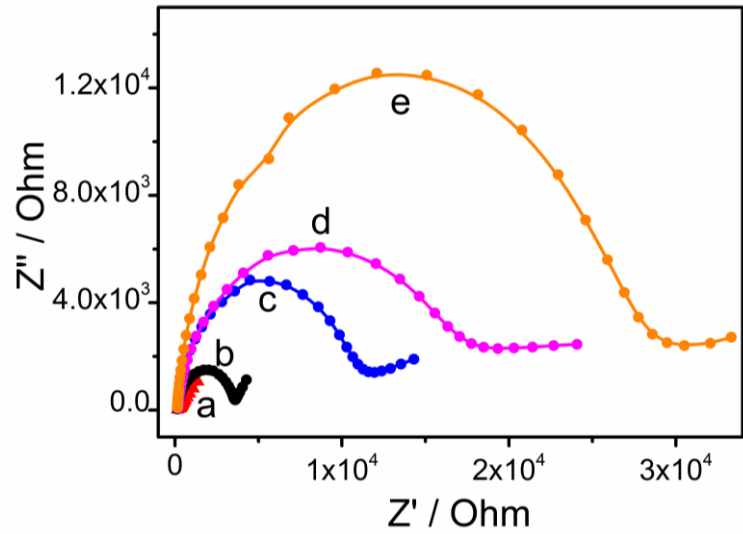

**Figure S4.** Electrochemical impedance spectra (Nyquist curves) for characterizing the modification of Ca/S on electrode, (a) bare Au electrode, (b) S/Au, (c) MCH/S/Au, (d) TB/R/MCH/S/Au and (e) TB/Ca/MCH/S/Au.

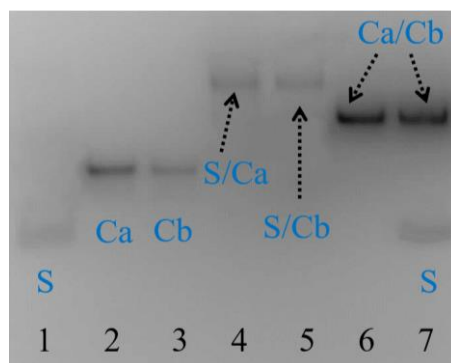

**Figure S5.** Native polyacrylamide gel electrophoresis (PAGE) analysis of the interactions between strands S, Ca, and Cb. For different channels: (1) S; (2) Ca; (3) Cb; (4) S+Ca; (5) S+Cb; (6) Ca+Cb; (7) S+Ca+Cb, strands Ca and Cb were pre-hybridized before reacting with S. The S/Ca represented the duplex, *others ditto*.

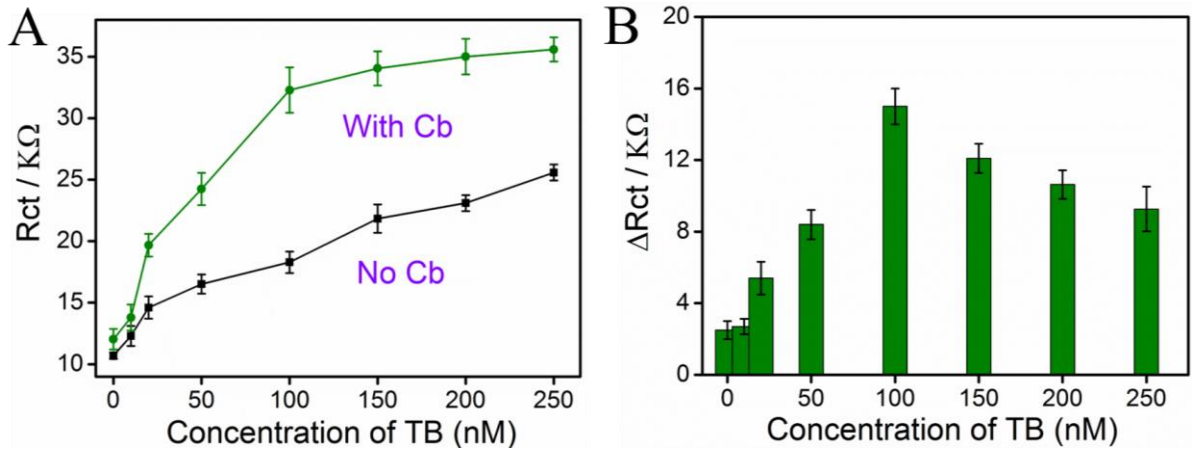

**Figure S6.** Optimization of the concentration ratio of TB used in this work. For (B), the  $\Delta R_{ct} = R_{ct}(\text{With Cb}) - R_{ct}(\text{No Cb})$ . As can be seen, the S/N ratio reached a highest value in the presence of 100 nM TB.

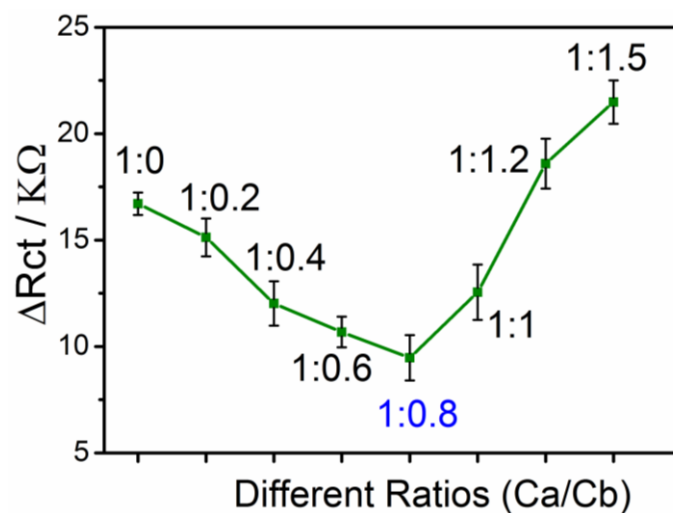

**Figure S7.** Optimization of the concentration ratio of strand Ca and Cb for their coexistence.  $\Delta R_{ct} = R_{ct}(a) - R_{ct}(i)$ , in which  $R_{ct}(i)$  and  $R_{ct}(a)$  represents the  $R_{ct}$  of initial platform and that after adding inputs/TB, respectively. The ratio of 1: 0.8 for C(Ca): C(Cb) was applied to obtain the lowest background.
